# Supplementary material
Source: Springer Nature journal article supplement (https://www.springermedizin.de/resource/supplementary/12877_2012_827_MOESM5_ESM.pdf/9440482)

Basic Mobility Scale (new)

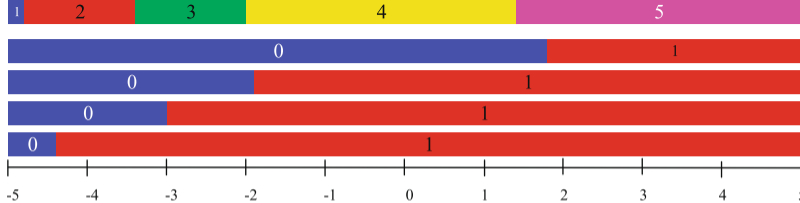

Walking Scale (new)

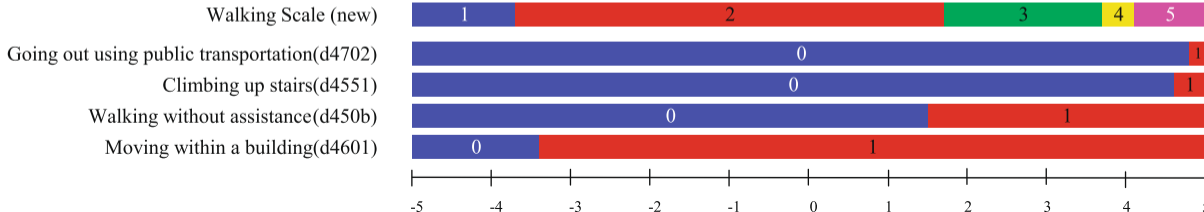

Supplement: MOESM5 [file 9440482]
